# Supplementary material
Source: MDPI journal article supplement (https://www.mdpi.com/2073-4433/12/8/1052)
Supplement: s1 [file s1]

# Supplementary Material: Future Projections and Uncertainty Assessment of Precipitation Extremes in Iran from the CMIP6 Ensemble

Juyoung Hong <sup>1</sup>, Khadijeh Javan <sup>2</sup>, Yonggwan Shin <sup>1</sup>, and Jeong-Soo Park <sup>1,\*</sup>

*1: Department of Mathematics and Statistics, Chonnam National University, Gwangju 61186, Korea.*

*2: Department of Geography, Urmia University, Urmia 009844, Iran.*

*\*: Corresponding author, E-mail: jspark@jnu.ac.kr, Tel: +82-62-530-3445*

August 16, 2021

## 1 Data and simulation models

Table S1 lists 24 climate models used in this study. Figure S2 shows examples of time series plots of the observations (blue line) and the bias-corrected data of a simulation model, for the AMP1 (Annual Maximum Daily Precipitation). Green lines represent no-bias-corrected historical data whereas red lines represent the bias-corrected data in each grid point (G10, G17, G24, and G42).

## 2 Multivariate bias correction

When bias-correction (BC) such as quantile mapping is used, most model weights based on performance become equal because of a perfect matching [1], and thus, the prediction is same as the simple average of the bias-corrected model outputs. This is approximately true for the MBC (Multivariate Bias Correction) [2] employed in this study because the MBC is a multivariate generalization of quantile mapping. Thus, the historical data is not bias corrected. No-bias-corrected historical data are utilized to calculate the performance weight of a model.

Chen et al.[3] found that the bivariate BC of rainfall and air temperature led to a much better performance than univariate BC. Cannon [2] proposes a multivariate generalization of quantile mapping (QM). It is an iterative method which conceptually lays between univariate bias correction (BC) methods and the empirical copula-based correction (EC-BC) [4]. For a

18 univariate BC, the quantile delta mapping (QDM) [5] is used, which preserves trends of model  
19 data

20 It approximately preserves the multivariate dependence of the driving climate model. Here,  
21 an image processing technique—the N-dimensional probability density function transform (N-  
22 pdft)—designed to transfer color information from one image to another is adapted. In each  
23 iteration, univariate QM is first applied separately to each variable. Then a multivariate BC  
24 is employed by re-scaling the multivariate anomalies based on Cholesky decomposition of the  
25 covariance matrix. The algorithm ends when both the corrected marginals and the dependence  
26 structure are sufficiently close to their observed counter parts. A variant is based on ranks  
27 rather than on the actual values [1]. It provides a multivariate quantile delta mapping, referred  
28 to as MBCn (multivariate bias correction with N-pdft) algorithm. It consists, in each iteration,  
29 of a random orthogonal rotation of multivariate input data, a univariate quantile delta mapping  
30 on the rotated fields and the inverse rotation. This algorithm approximately preserves trends  
31 of model data. We used the 'MBC' package [6] in R for computation. More details are found  
32 in Cannon [2].

### 33 3 Computing weights

#### 34 3.1 Performance weights

35 To compute the performance of each model,  $T$ -year return levels are compared based on the  
36 GEVD(Generalized Extreme Value Distribution) fitting on the historical data and the obser-  
37 vations. Let us denote  $r_T^i$  and  $r_T^0$  as  $T$ -year return level obtained from the historical data of  
38  $i$ -th model and the observations, respectively. These values are normalized as follows to make  
39 it scale-free, for  $i = 0, 1, \dots, M$ :

$$40 \quad \tilde{r}_T^i = \frac{r_T^i - med_i}{R_i}, \quad (1)$$

41 where

$$42 \quad R_i = \begin{cases} max_i - med_i & \text{if } r_T^i \geq med_i, \\ med_i - min_i & \text{if } r_T^i < med_i, \end{cases} \quad (2)$$

43 and  $max_i$ ,  $min_i$ , and  $med_i$  are the maximum, the minimum, and the median of  $i$ -th model  
44 data. Other ways of standardizations are also possible.

45 The distance for performance measure is calculated by

$$46 \quad D_i^2 = \sum_T (\tilde{r}_T^i - \tilde{r}_T^0)^2. \quad (3)$$

47 We set  $T = 2, 5, 10, 20, 30, 50$ , and 100. Note that  $D_i$  does not depend on the shape parameter  
48  $\sigma_D$ , and so obtained  $D_i$ s are fixed for the next computation.

### 3.2 Independence weights

To calculate the model similarity  $S_{ij}$ , we follow a technique among several methods proposed by Sanderson et al. [7]. A method employed in this study is based on the empirical orthogonal function (EOF) or principal component analysis. The following process is done for each grid: First, for each model, the historical data and the future simulation data from three scenarios are lined up as one time series data. The bias correction is not applied to all data for this process. We can choose the historical data only, as was done by Brunner et al. [8], but we deploy all simulation data for a maximum use of available information. For each time series induced from each model, seven year moving averages are obtained. Then, a correlation matrix  $R$  among all  $M$  models is constructed by applying the Spearman correlation coefficients to those  $M$  numbers of the series of seven year moving averages, for each climate variable. That is,  $R$  is the correlation matrix of  $M$  models, with size  $M \times M$ .

A singular value decomposition (SVD) is applied to  $R^{1/2}$  and truncated to  $t$  modes to calculate the dominant modes of multivariate ensemble variability such that

$$R^{1/2} = U\lambda V^T, \quad (4)$$

where  $U$  is an orthogonal matrix of model loadings ( $M$  by  $t$  size) whose columns are the eigenvectors of the model correlation matrix  $R$ ,  $\lambda$  ( $t$  by  $t$ ) are the eigenvalues of  $R$ , and  $V$  ( $M$  by  $t$ ) are the eigenvectors of  $R$ . The dimensions are sorted by decreasing eigenvalue, such that the basis set can be truncated to a smaller number of modes  $t$  [7]. Note that  $t$  is often determined by selecting a number of the eigenvalues greater than 1.

The model loadings  $U$  define a  $t$ -dimensional space in which intermodel and observation-model Euclidean distances may be defined, where  $t$  is the truncation length of the SVD. The inter-model distances are measured in a Euclidean sense in the loadings matrix, so that the distances  $S_{ij}$  between two models  $i$  and  $j$  are expressed as [7]

$$S_{ij} = \left\{ \sum_{l=1}^t [U(i, l) - U(j, l)]^2 \right\}^{1/2}. \quad (5)$$

$U(i, l)$  is interpreted as a correlation or a dependency of the model  $i$  to the  $l$ -th principal component. Thus, a small  $S_{ij}$  value means high dependency or similarity between models  $i$  and  $j$ .

The above procedures are done separately for each of five climate variables. Thus, we have five distances between models  $i$  and  $j$ , corresponding to five climate variables. Then, the final distances are computed by averaging those five distances for models  $i$  and  $j$ .

### 3.3 Selection of $\sigma_S$

To select an appropriate value of the shape parameter  $\sigma_S$  for the I-weights, we follow an entropy-based approach by Shin et al.[9]. We denote  $I_i(\sigma_S)$  as a normalized I-weight for model  $i$  and for the given  $\sigma_S$ , as defined in the following:

$$I_i(\sigma_S) = \frac{s_i(\sigma_S)}{\sum_{l=1}^M s_l(\sigma_S)}, \quad (6)$$

where  $s_i(\sigma_S) = \frac{1}{1 + \sum_{j \neq i}^M \exp(-\frac{S_{ij}}{\sigma_S})}$ .

The entropy of the I-weights as a measure of uncertainty [10] from these weights is defined by the following:

$$E(\sigma_S) = - \sum_{i=1}^M I_i(\sigma_S) \log I_i(\sigma_S) \quad (7)$$

as a function of  $\sigma_S$ . When all  $I_i(\sigma_S)$ s are almost equal, the entropy has a high value. We thus expect the entropy to increase because  $\sigma_S$  has a large value. Note that the calculation of  $S_{ij}$  does not depend on  $\sigma_S$ , and thus, the  $S_{ij}$  values obtained are fixed for the entropy computation. The entropy is computed as  $\sigma_S$  changes from 0.1 to 1.0 in increments of 0.01.

Figure 1 presents the entropy function of  $\sigma_S$  computed from the data used for this study, which indicates that it is at its minimum at  $\sigma_S = 0.4$ . It is interesting to note that the entropy function increases as  $\sigma_S$  decreases from 0.4 to zero. This is explained by looking into the similarity measure  $1 + \sum_{j \neq i}^M \exp(-\frac{S_{ij}}{\sigma_S})$ . As  $\sigma_S$  moves toward zero, this measure converges at one for all  $i$ . Thus,  $s_i$  moves toward one, and  $I_i$  is close to  $1/M$  for all  $i$ . Because we want to have a shape parameter  $\sigma_S$  that can differentiate the I-weights most distinctly with minimum uncertainty, the value  $\sigma_S = 0.4$  minimizing the entropy is chosen in this study.

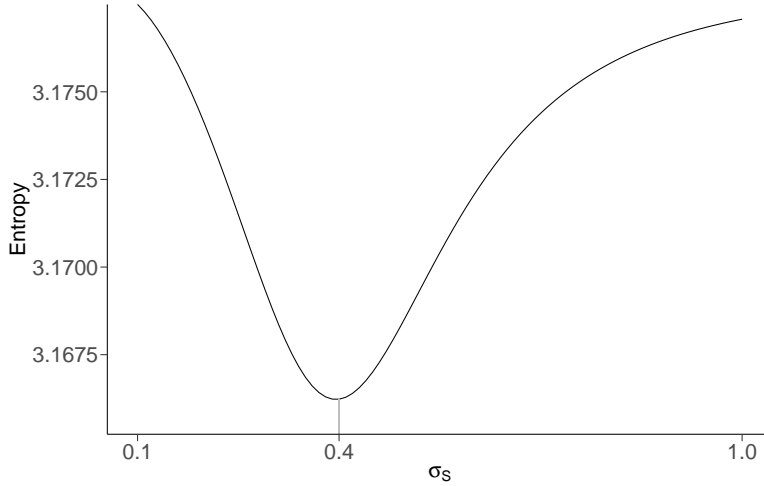

Figure S 1: Plot of the entropy as  $\sigma_S$  changes from 0.1 to 1.0 and the selected  $\sigma_S = 0.4$ .

## 4 Result

### 4.1 Relative change

The relative change of 20 year return level in the period P1 relative to the reference period P0 is defined as:

$$\delta R_{20}(P1) = \frac{R_{20}(P1) - R_{20}(P0)}{R_{20}(P0)} \times 100, \quad (8)$$

where  $R_{20}(P)$  is the 20 year return level in the period P.

### 4.2 Return period and exceedance probability

We have experienced some technical flaws in computing the waiting time or the return periods corresponding to a return value. For example, the resulting return period sometimes turns out to be greater than 500 years even though it is expected to correspond to 50 years. It may be due to the cumulation of truncation or rounding errors in computer, related to inverting the quantile function of the GEVD. A trouble caused by this flow does not vanish even applied to unequally weighted regional frequency analysis (RFA). In this study, we thus adopted the trimmed mean [11] in RFA in which unfairly high estimates of return periods are deleted in computing the weighted average. The defects of return periods are described in Serinaldi [12].

The spatially averaged estimates of exceedance probability over Iran are presented in Figure S5 and in Table S5.

## References

- [1] Maraun D, Widmann M (2018) *Statistical downscaling and bias correction for climate research*. Cambridge Univ Press.
- [2] Cannon AJ (2018) Multivariate quantile mapping bias correction: an N-dimensional probability density function transform for climate model simulations of multiple variables. *Clim Dyn* 50:31–49.
- [3] Chen J, Li C, Brissette FP, Chen H, Wang M, Essou GRC (2018) Impacts of correcting the inter-variable correlation of climate model outputs on hydrological modeling. *J Hydrol* 560:326–341.
- [4] Vrac M, Friederichs P (2015) Multivariate-intervariable, spatial, and temporal-bias correction. *J Clim* 28:218–237.
- [5] Cannon AJ, Sobie SR, Murdock TQ (2015) Bias correction of GCM precipitation by quantile mapping: How well do methods preserve changes in quantiles and extremes? *J Climate* 28:6938–6959.

- 131 [6] Cannon AJ (2018) Package ‘MBC’ in R, version 0.10-4. [https://cran.r-](https://cran.r-project.org/web/packages/MBC/MBC.pdf)  
132 [project.org/web/packages/MBC/MBC.pdf](https://cran.r-project.org/web/packages/MBC/MBC.pdf)
- 133 [7] Sanderson, B.M.; Knutti, R.; Caldwell, P. Addressing interdependency in a multimodel  
134 ensemble by interpolation of model properties. *J. Clim.* **2015**, *28*, 5150–5170.
- 135 [8] Brunner, L.; Pendergrass, A.G.; Lehner, F.; Merrifield, A.L.; Lorenz, R.; Knutti, R. Re-  
136 duced global warming from CMIP6 projections when weighting models by performance and  
137 independence. *Earth Syst. Dyn. Discuss.* **2020**, *11*, 995–1012, doi:10.5194/esd-2020-23.
- 138 [9] Shin, Y.; Shin, Y.; Hong, J.; Kim, M.-K.; Byun, Y.-H.; Boo, K.-O.; Chung, I.-U.; Park,  
139 D.-S.R.; Park, J.-S. Future Projections and Uncertainty Assessment of Precipitation Ex-  
140 tremes in the Korean Peninsula from the CMIP6 Ensemble with a Statistical Framework.  
141 *Atmosphere* **2021**, *12*(1), 97.
- 142 [10] Ross, S. *A First Course in Probability*, 8th ed.; Pearson Prentice Hall: Upper Saddle  
143 River, NJ, USA, 2010.
- 144 [11] Wilks D (2011) *Statistical Methods in the Atmospheric Sciences*, 3rd Ed., Academic Press,  
145 New York.
- 146 [12] Serinaldi F (2015) Dismissing return periods! Stoch Environ Res Risk Assess  
147 29:1179–1189. <https://doi.org/10.1007/s00477-014-0916-1>

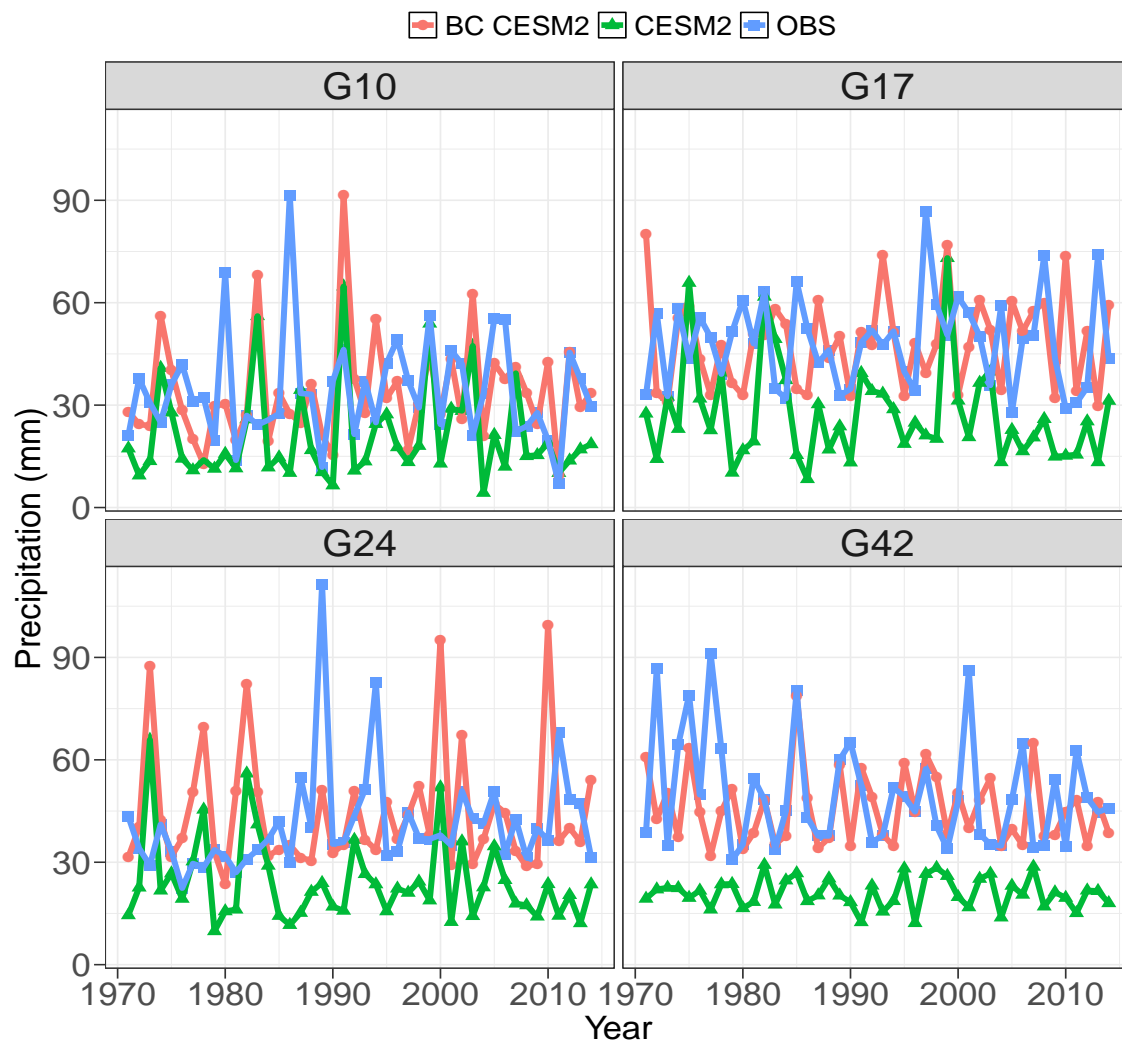

Figure S 2: Examples of time series plots to show the bias correction of the CESM2 simulation data (green line) to the observations (blue line), where red lines represent the bias-corrected data in each grid point (G10, G17, G24, and G42).

Table S 1: The list of 24 CMIP6 (Coupled Model Intercomparison Project Phase 6) models analyzed in this study. The detailed information on each model are available at ESGF-node <https://esgf-node.llnl.gov/projects/cmip6/>.

| Model Name       | Institution                                                                     | Country   | Resolution<br>(Lon $\times$ Lat Level) |
|------------------|---------------------------------------------------------------------------------|-----------|----------------------------------------|
| ACCESS-CM2       | CSIRO, ARCCSS (Australian Res Council Centre of Excellence for Clim System Sci) | Australia | 192 $\times$ 144<br>L85                |
| ACCESS-ESM1-5    | Commonwealth Scientific & Industrial Res Organ (CSIRO)                          | Australia | 192 $\times$ 145<br>L38                |
| BCC-CSM2-MR      | Beijing Clim Center                                                             | China     | 320 $\times$ 160<br>L46(T106)          |
| CanESM5          | Canadian Centre Clim Model & Analysis, Enviro & Clim Change (CCCma)             | Canada    | 128 $\times$ 64<br>L49(T63)            |
| CESM2-WACCM      | Nat Center for Atmos Res, Clim & Global Dynamics Lab (NCAR)                     | USA       | 288 $\times$ 192<br>L70                |
| CESM2            | Nat Center for Atmos Res, Clim & Global Dynamics Lab (NCAR)                     | USA       | 288 $\times$ 192<br>L32                |
| CMCC-CM2-SR5     | Fondazione Centro Euro-Mediterraneo sui Cambiamenti Climatici(CMCC)             | Italy     | 288 $\times$ 192<br>L30                |
| CMCC-ESM2        | Fondazione Centro Euro-Mediterraneo sui Cambiamenti Climatici(CMCC)             | Italy     | 288 $\times$ 192<br>L30                |
| EC-Earth3-Veg-LR | EC-Earth consortium, Swedish Meteo & Hydro Inst/SMHI, Sweden                    | EU        | 320 $\times$ 160<br>L62(TL255)         |
| EC-Earth3-Veg    | EC-Earth consortium, Swedish Meteo & Hydro Inst/SMHI, Sweden                    | EU        | 512 $\times$ 256<br>L91(TL255)         |
| EC Earth 3.3     | EC-Earth consortium, Swedish Meteo & Hydro Inst/SMHI, Sweden                    | EU        | 512 $\times$ 256<br>L91(TL255)         |
| FGOALS-g3        | Chinese Academy of Sciences (CAS)                                               | China     | 180 $\times$ 80<br>L26                 |
| GFDL-ESM4        | National Oceanic & Atmos Admi, Geophy Fluid Dynamics Lab                        | USA       | 360 $\times$ 180<br>L49                |
| INM-CM4-8        | Inst for Numerical Math, Russian Acad of Sci (INM)                              | Russia    | 180 $\times$ 120<br>L21                |
| INM-CM5-0        | Inst for Numerical Math, Russian Acad of Sci (INM)                              | Russia    | 180 $\times$ 120<br>L73                |
| IPSL-CM6A-LR     | Institut Pierre Simon Laplace (IPSL)                                            | France    | 144 $\times$ 143<br>L79                |
| KACE1.0-GLOMAP   | National Inst of Meteo Sci/Meteo Admin, Clim Res Div (NIMS-KMA)                 | Korea     | 192 $\times$ 144<br>L85                |
| MIROC6           | JAMSTEC, AORI, NIES, R-CCS (MIROC)                                              | Japan     | 256 $\times$ 128<br>L81(T85)           |
| MPI-ESM1.2-HR    | Max Planck Inst for Meteo (MPI-M)                                               | Germany   | 384 $\times$ 192<br>L95(T127)          |
| MPI-ESM1.2-LR    | Max Planck Inst for Meteo (MPI-M)                                               | Germany   | 192 $\times$ 96<br>L47(T63)            |
| MRI-ESM2.0       | Meteoro Research Institute (MRI)                                                | Japan     | 320 $\times$ 160<br>L80(TL159)         |
| NorESM2-LM       | NorESM Consortium of CICERO, MET-Norway, NERSC, NILU, UiB, UiO, UNI             | Norway    | 144 $\times$ 96<br>L32                 |
| NorESM2-MM       | NorESM Consortium of CICERO, MET-Norway, NERSC, NILU, UiB, UiO, UNI             | Norway    | 288 $\times$ 192<br>L32                |
| TaiESM1          | Research Center for Environmental Changes, Academia Sinica, Nankang(AS-RCEC)    | Taiwan    | 288 $\times$ 192<br>L30                |



Table S 2: The similarity distance metric  $S_{ij}$  between model  $i$  and model  $j$ . Small values indicate high dependency or high similarity between two models.

|                  | EC-Earth3 | CanESM5 | EC-Earth3-Veg | KACE-1-0-G | BCC-CSM2-MR | GFDL-ESM4 | FGOALS-g3 |
|------------------|-----------|---------|---------------|------------|-------------|-----------|-----------|
| ACCESS-CM2       | 0.70      | 0.66    | 0.68          | 0.68       | 0.79        | 0.80      | 0.80      |
| ACCESS-ESM1-5    | 0.70      | 0.68    | 0.70          | 0.69       | 0.79        | 0.80      | 0.80      |
| BCC-CSM2-MR      | 0.73      | 0.73    | 0.73          | 0.76       | 0.00        | 0.81      | 0.84      |
| CanESM5          | 0.60      | 0.00    | 0.63          | 0.63       | 0.73        | 0.76      | 0.78      |
| CESM2-WACCM      | 0.69      | 0.68    | 0.69          | 0.70       | 0.77        | 0.78      | 0.79      |
| CESM2            | 0.67      | 0.71    | 0.71          | 0.71       | 0.79        | 0.78      | 0.82      |
| CMCC-CM2-SR5     | 0.63      | 0.62    | 0.62          | 0.66       | 0.73        | 0.77      | 0.78      |
| CMCC-ESM2        | 0.63      | 0.64    | 0.62          | 0.65       | 0.75        | 0.77      | 0.78      |
| EC-Earth3-Veg-LR | 0.61      | 0.64    | 0.61          | 0.69       | 0.74        | 0.77      | 0.79      |
| EC-Earth3-Veg    | 0.55      | 0.63    | 0.00          | 0.67       | 0.73        | 0.74      | 0.73      |
| EC-Earth3        | 0.00      | 0.60    | 0.55          | 0.65       | 0.73        | 0.75      | 0.76      |
| FGOALS-g3        | 0.76      | 0.78    | 0.73          | 0.80       | 0.84        | 0.83      | 0.00      |
| GFDL-ESM4        | 0.75      | 0.76    | 0.74          | 0.77       | 0.81        | 0.00      | 0.83      |
| INM-CM4-8        | 0.73      | 0.70    | 0.71          | 0.72       | 0.82        | 0.83      | 0.84      |
| INM-CM5-0        | 0.73      | 0.72    | 0.72          | 0.76       | 0.83        | 0.85      | 0.82      |
| IPSL-CM6A-LR     | 0.63      | 0.63    | 0.62          | 0.66       | 0.74        | 0.75      | 0.78      |
| KACE-1-0-G       | 0.65      | 0.63    | 0.67          | 0.00       | 0.76        | 0.77      | 0.80      |
| MIROC6           | 0.68      | 0.71    | 0.71          | 0.74       | 0.79        | 0.80      | 0.81      |
| MPI-ESM1-2-HR    | 0.74      | 0.72    | 0.73          | 0.76       | 0.80        | 0.82      | 0.84      |
| MPI-ESM1-2-LR    | 0.71      | 0.71    | 0.74          | 0.72       | 0.77        | 0.79      | 0.82      |
| MRI-ESM2-0       | 0.68      | 0.71    | 0.72          | 0.73       | 0.80        | 0.81      | 0.83      |
| NorESM2-LM       | 0.71      | 0.70    | 0.70          | 0.74       | 0.76        | 0.80      | 0.82      |
| NorESM2-MM       | 0.70      | 0.71    | 0.71          | 0.74       | 0.80        | 0.81      | 0.82      |
| TaiESM1          | 0.65      | 0.65    | 0.67          | 0.68       | 0.75        | 0.77      | 0.81      |
| Sum              | 15.65     | 15.69   | 15.70         | 16.33      | 17.82       | 18.15     | 18.50     |

Table S 3: Statistics of 20 year and 50 year return levels of the annual largest daily rainfall (unit: mm) averaged over 47 grids in Iran for the observations (OBS) and the future periods; P1 (2021-2050), P2 (2046-2075), and P3 (2071-2100) under the SSP2, SSP3, and SSP5 scenarios.

|         |           |     | SSP2-4.5 |    |    | SSP3-7.0 |    |    | SSP5-8.5 |    |    |
|---------|-----------|-----|----------|----|----|----------|----|----|----------|----|----|
| Year    | Statistic | OBS | P1       | P2 | P3 | P1       | P2 | P3 | P1       | P2 | P3 |
| 20-year | Mean      | 54  | 60       | 61 | 62 | 60       | 62 | 66 | 60       | 64 | 69 |
|         | Q1        | 46  | 51       | 51 | 52 | 49       | 51 | 54 | 51       | 55 | 59 |
|         | Median    | 57  | 64       | 64 | 65 | 63       | 65 | 71 | 64       | 69 | 73 |
|         | Q3        | 63  | 71       | 72 | 74 | 71       | 73 | 79 | 71       | 75 | 79 |
| 50-year | Mean      | 66  | 73       | 75 | 76 | 74       | 77 | 82 | 74       | 79 | 86 |
|         | Q1        | 57  | 63       | 65 | 65 | 62       | 64 | 69 | 65       | 70 | 77 |
|         | Median    | 71  | 78       | 82 | 83 | 80       | 81 | 86 | 79       | 84 | 89 |
|         | Q3        | 77  | 85       | 87 | 89 | 87       | 90 | 97 | 85       | 91 | 99 |

Table S 4: Relative change (unit: %) in 20 year and 50 year return levels of the annual largest daily rainfall averaged over Iran from 1971 to 2014.

|         |        | SSP2-4.5 |      |      | SSP3-7.0 |      |      | SSP5-8.5 |      |      |
|---------|--------|----------|------|------|----------|------|------|----------|------|------|
|         |        | P1       | P2   | P3   | P1       | P2   | P3   | P1       | P2   | P3   |
| 20-year | Mean   | 10.9     | 13.4 | 14.9 | 10.9     | 14.8 | 23.1 | 12.3     | 19.4 | 28.7 |
|         | Q1     | 7.5      | 10.2 | 12.6 | 7.6      | 11.9 | 18.7 | 9.7      | 15.7 | 24.6 |
|         | Median | 11.9     | 13.9 | 15.6 | 11.2     | 14.7 | 23.2 | 12.3     | 19.6 | 28.7 |
|         | Q3     | 14.2     | 17.0 | 18.2 | 14.2     | 18.0 | 27.1 | 16.0     | 23.2 | 32.1 |
| 50-year | Mean   | 11.4     | 13.7 | 15.8 | 12.1     | 15.8 | 24.4 | 12.8     | 20.4 | 30.3 |
|         | Q1     | 7.1      | 10.9 | 12.9 | 8.5      | 11.8 | 19.7 | 8.7      | 15.6 | 24.7 |
|         | Median | 12.9     | 13.6 | 17.5 | 11.6     | 15.7 | 25.2 | 13.9     | 20.4 | 30.0 |
|         | Q3     | 15.1     | 18.3 | 19.6 | 15.8     | 19.2 | 28.7 | 17.9     | 25.3 | 35.0 |

Table S 5: Spatially averaged exceedance probabilities over Iran for the annual maximum daily precipitation (AMP1) from 20 mm to 100 mm, obtained from the observations (OBS) and the CMIP6 models under the three scenarios for three future periods.

|          | AMP1  | OBS    | SSP2-4.5 | SSP3-7.0 | SSP5-8.5 |
|----------|-------|--------|----------|----------|----------|
| Period 1 | 20mm  | 0.736  | 0.790    | 0.756    | 0.806    |
|          | 30mm  | 0.334  | 0.368    | 0.357    | 0.454    |
|          | 40mm  | 0.114  | 0.160    | 0.153    | 0.160    |
|          | 50mm  | 0.030  | 0.070    | 0.075    | 0.077    |
|          | 60mm  | 0.010  | 0.028    | 0.025    | 0.030    |
|          | 80mm  | 0.001  | 0.004    | 0.004    | 0.008    |
|          | 100mm | <0.001 | 0.001    | 0.001    | 0.002    |
| Period 2 | 20mm  | 0.736  | 0.832    | 0.798    | 0.827    |
|          | 30mm  | 0.334  | 0.424    | 0.380    | 0.435    |
|          | 40mm  | 0.114  | 0.186    | 0.174    | 0.200    |
|          | 50mm  | 0.030  | 0.078    | 0.073    | 0.092    |
|          | 60mm  | 0.010  | 0.027    | 0.031    | 0.041    |
|          | 80mm  | 0.001  | 0.005    | 0.004    | 0.011    |
|          | 100mm | <0.001 | 0.002    | 0.001    | 0.004    |
| Period 3 | 20mm  | 0.736  | 0.802    | 0.823    | 0.851    |
|          | 30mm  | 0.334  | 0.394    | 0.469    | 0.470    |
|          | 40mm  | 0.114  | 0.161    | 0.213    | 0.245    |
|          | 50mm  | 0.030  | 0.064    | 0.098    | 0.126    |
|          | 60mm  | 0.010  | 0.023    | 0.038    | 0.050    |
|          | 80mm  | 0.001  | 0.005    | 0.007    | 0.013    |
|          | 100mm | <0.001 | 0.002    | 0.003    | 0.004    |

Table S 6: The expected frequency of reoccurring years during 30 years for specific the annual maximum daily precipitation (AMP1) values from 20 mm to 100 mm in Iran, obtained from the observations (OBS) and the CMIP6 models under the 3 scenarios for 3 future periods.

| AMP1  | OBS    | SSP2-4.5 |        |        | SSP3-7.0 |        |        | SSP5-8.5 |        |        |
|-------|--------|----------|--------|--------|----------|--------|--------|----------|--------|--------|
|       |        | P1       | P2     | P3     | P1       | P2     | P3     | P1       | P2     | P3     |
| 20mm  | 22.080 | 23.700   | 24.960 | 24.060 | 22.680   | 23.940 | 24.690 | 24.180   | 24.810 | 25.530 |
| 30mm  | 10.020 | 11.040   | 12.720 | 11.820 | 10.710   | 11.400 | 14.070 | 13.620   | 13.050 | 14.100 |
| 40mm  | 3.420  | 4.800    | 5.580  | 4.830  | 4.590    | 5.220  | 6.390  | 4.800    | 6.000  | 7.350  |
| 50mm  | 0.900  | 2.100    | 2.340  | 1.920  | 2.250    | 2.190  | 2.940  | 2.310    | 2.760  | 3.780  |
| 60mm  | 0.300  | 0.840    | 0.810  | 0.690  | 0.750    | 0.930  | 1.140  | 0.900    | 1.230  | 1.500  |
| 80mm  | 0.030  | 0.120    | 0.150  | 0.150  | 0.120    | 0.120  | 0.210  | 0.240    | 0.330  | 0.390  |
| 100mm | 0.012  | 0.030    | 0.060  | 0.060  | 0.030    | 0.030  | 0.090  | 0.060    | 0.120  | 0.120  |

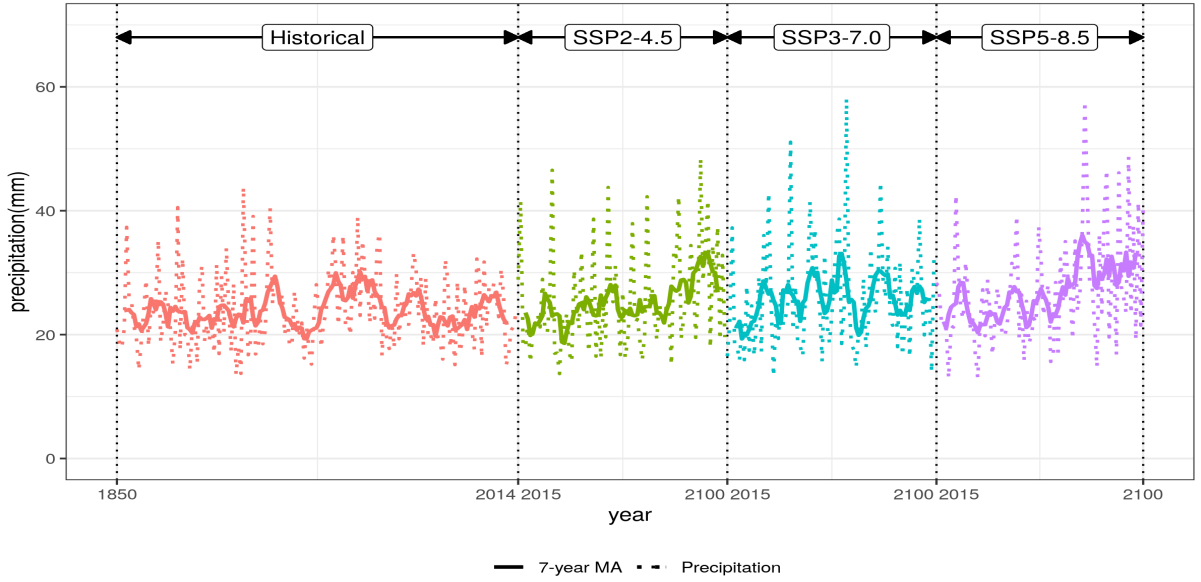

Figure S 3: Arrangement of data and 7 year moving averages composed of the historical data from 1850 to 2014 and the future data from 2015 to 2100 under SSP2, SSP3, and SSP5 scenarios for computing the Spearman correlation coefficient between models.

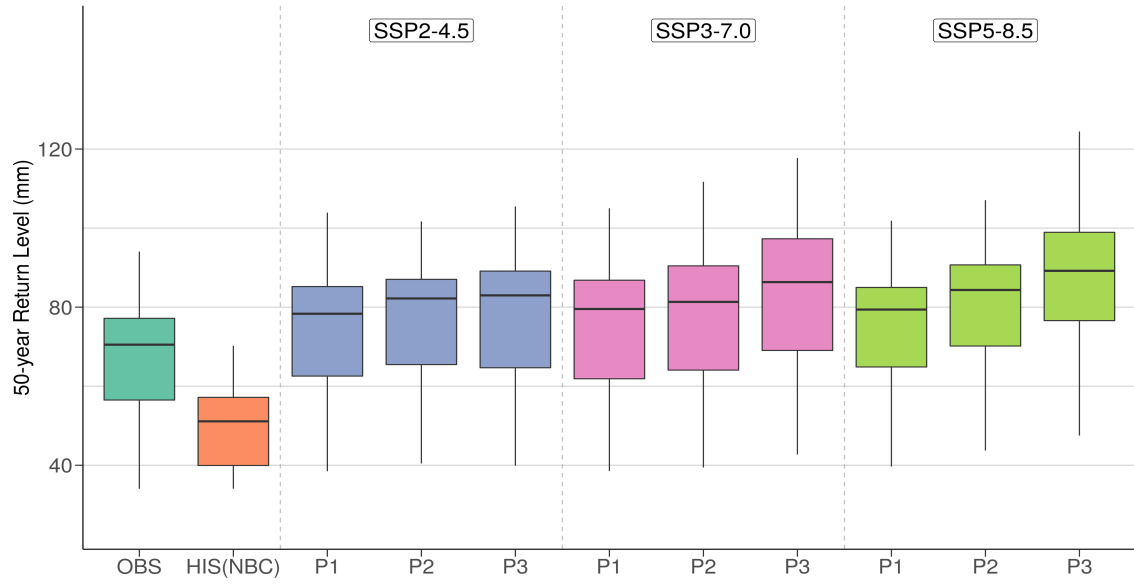

Figure S 4: Box-plots of 50 year return levels of the annual largest daily rainfall (unit: mm) averaged over 47 grids in Iran for the future periods P1 (2021–2050), P2 (2046–2075), and P3 (2071–2100) under the SSP2, SSP3, and SSP5 scenarios. OBS and HIST(NBC) stand for the observations and the historical data without bias correction.

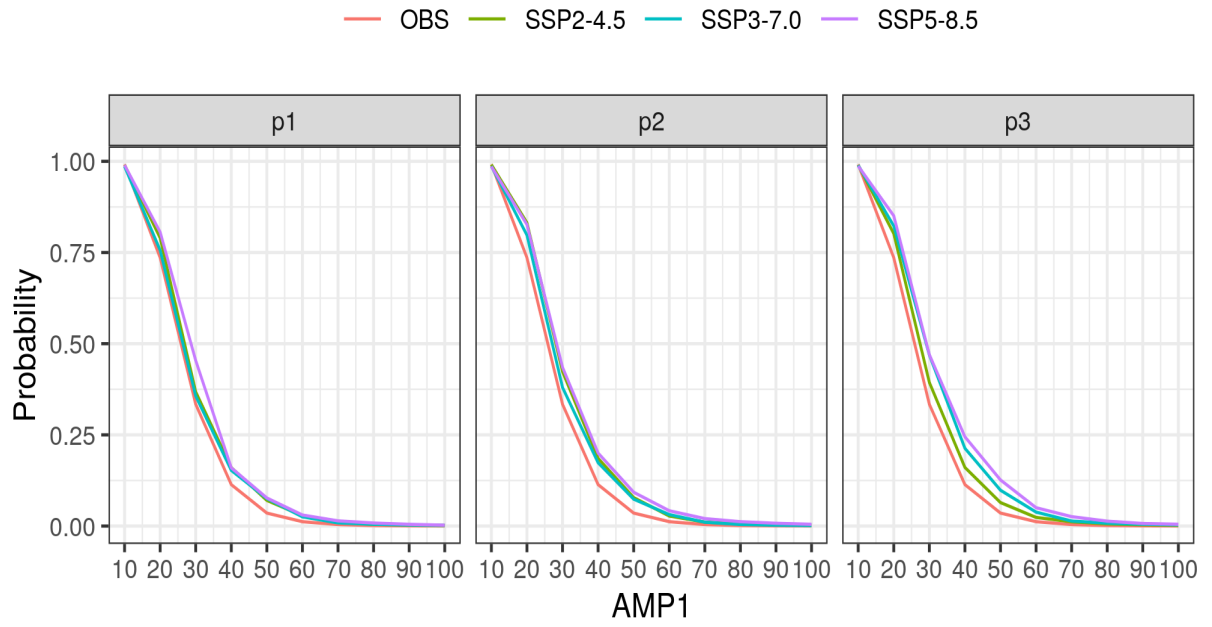

Figure S 5: The exceedance probability plots for the annual maximum daily precipitation (AMP1) from 10 mm to 100 mm in Iran, calculated from the observations (OBS) and the CMIP6 models under the three scenarios for three future periods.
