# Supplementary material
Source: MDPI journal article supplement (https://www.mdpi.com/2073-4433/12/8/1052)

BC CESM2 CESM2 OBS

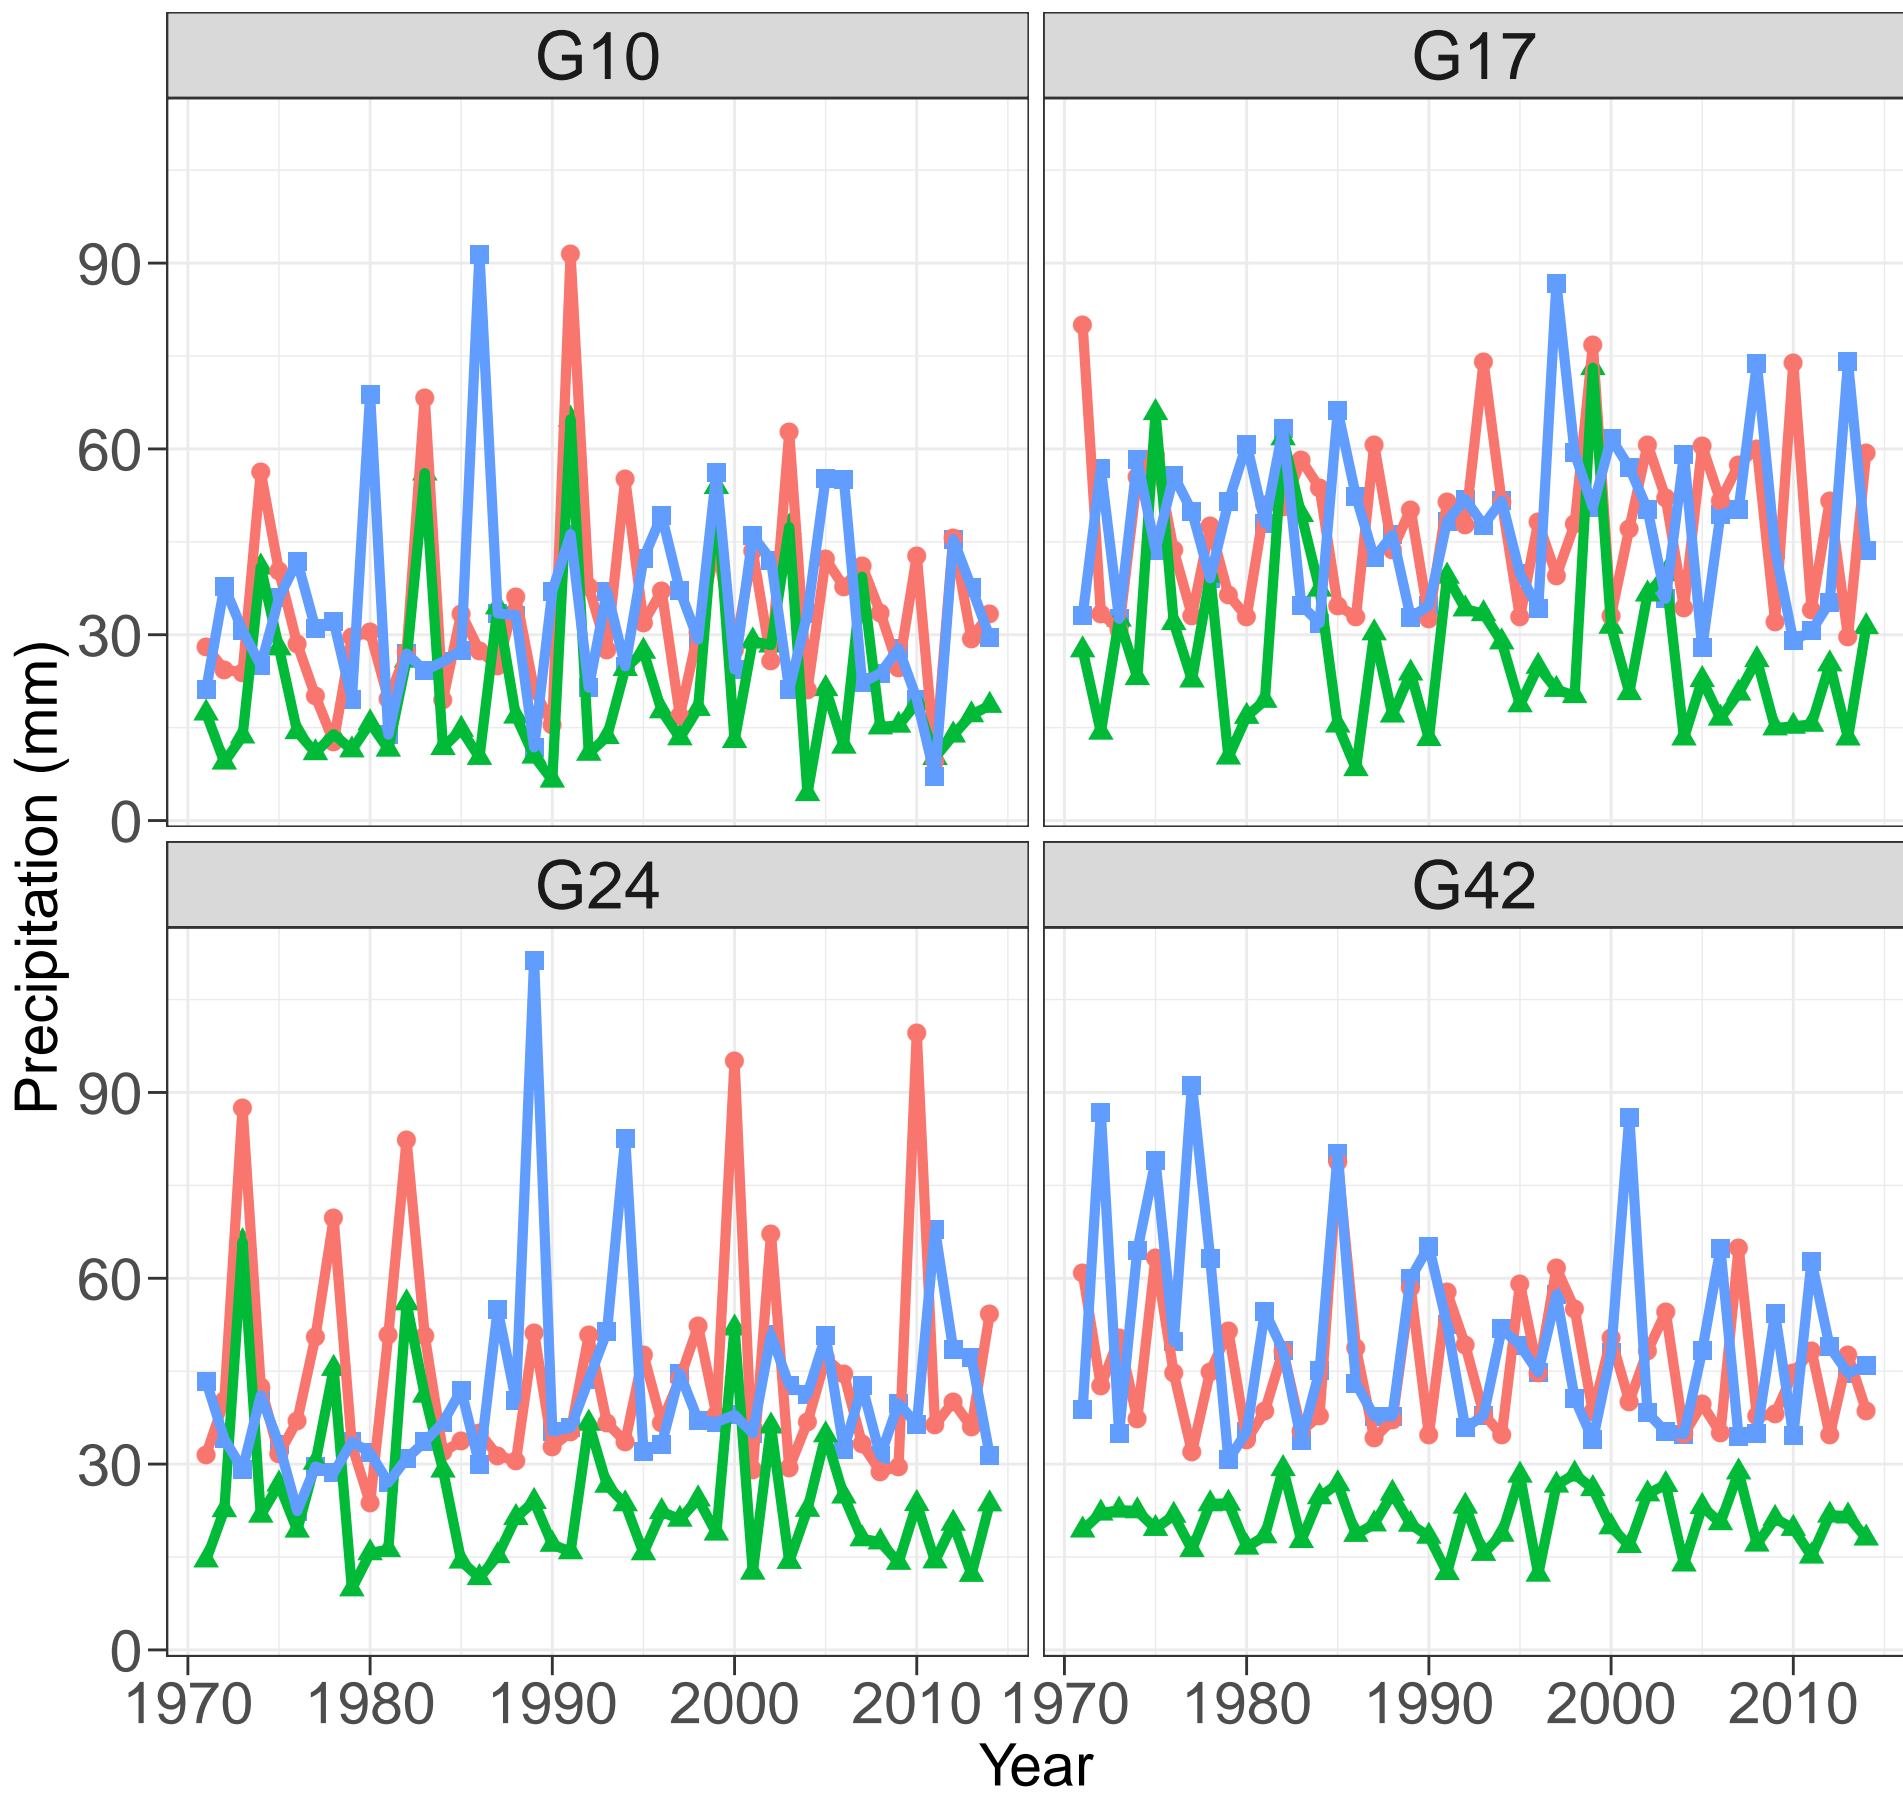

Supplement: s1 [file s1]

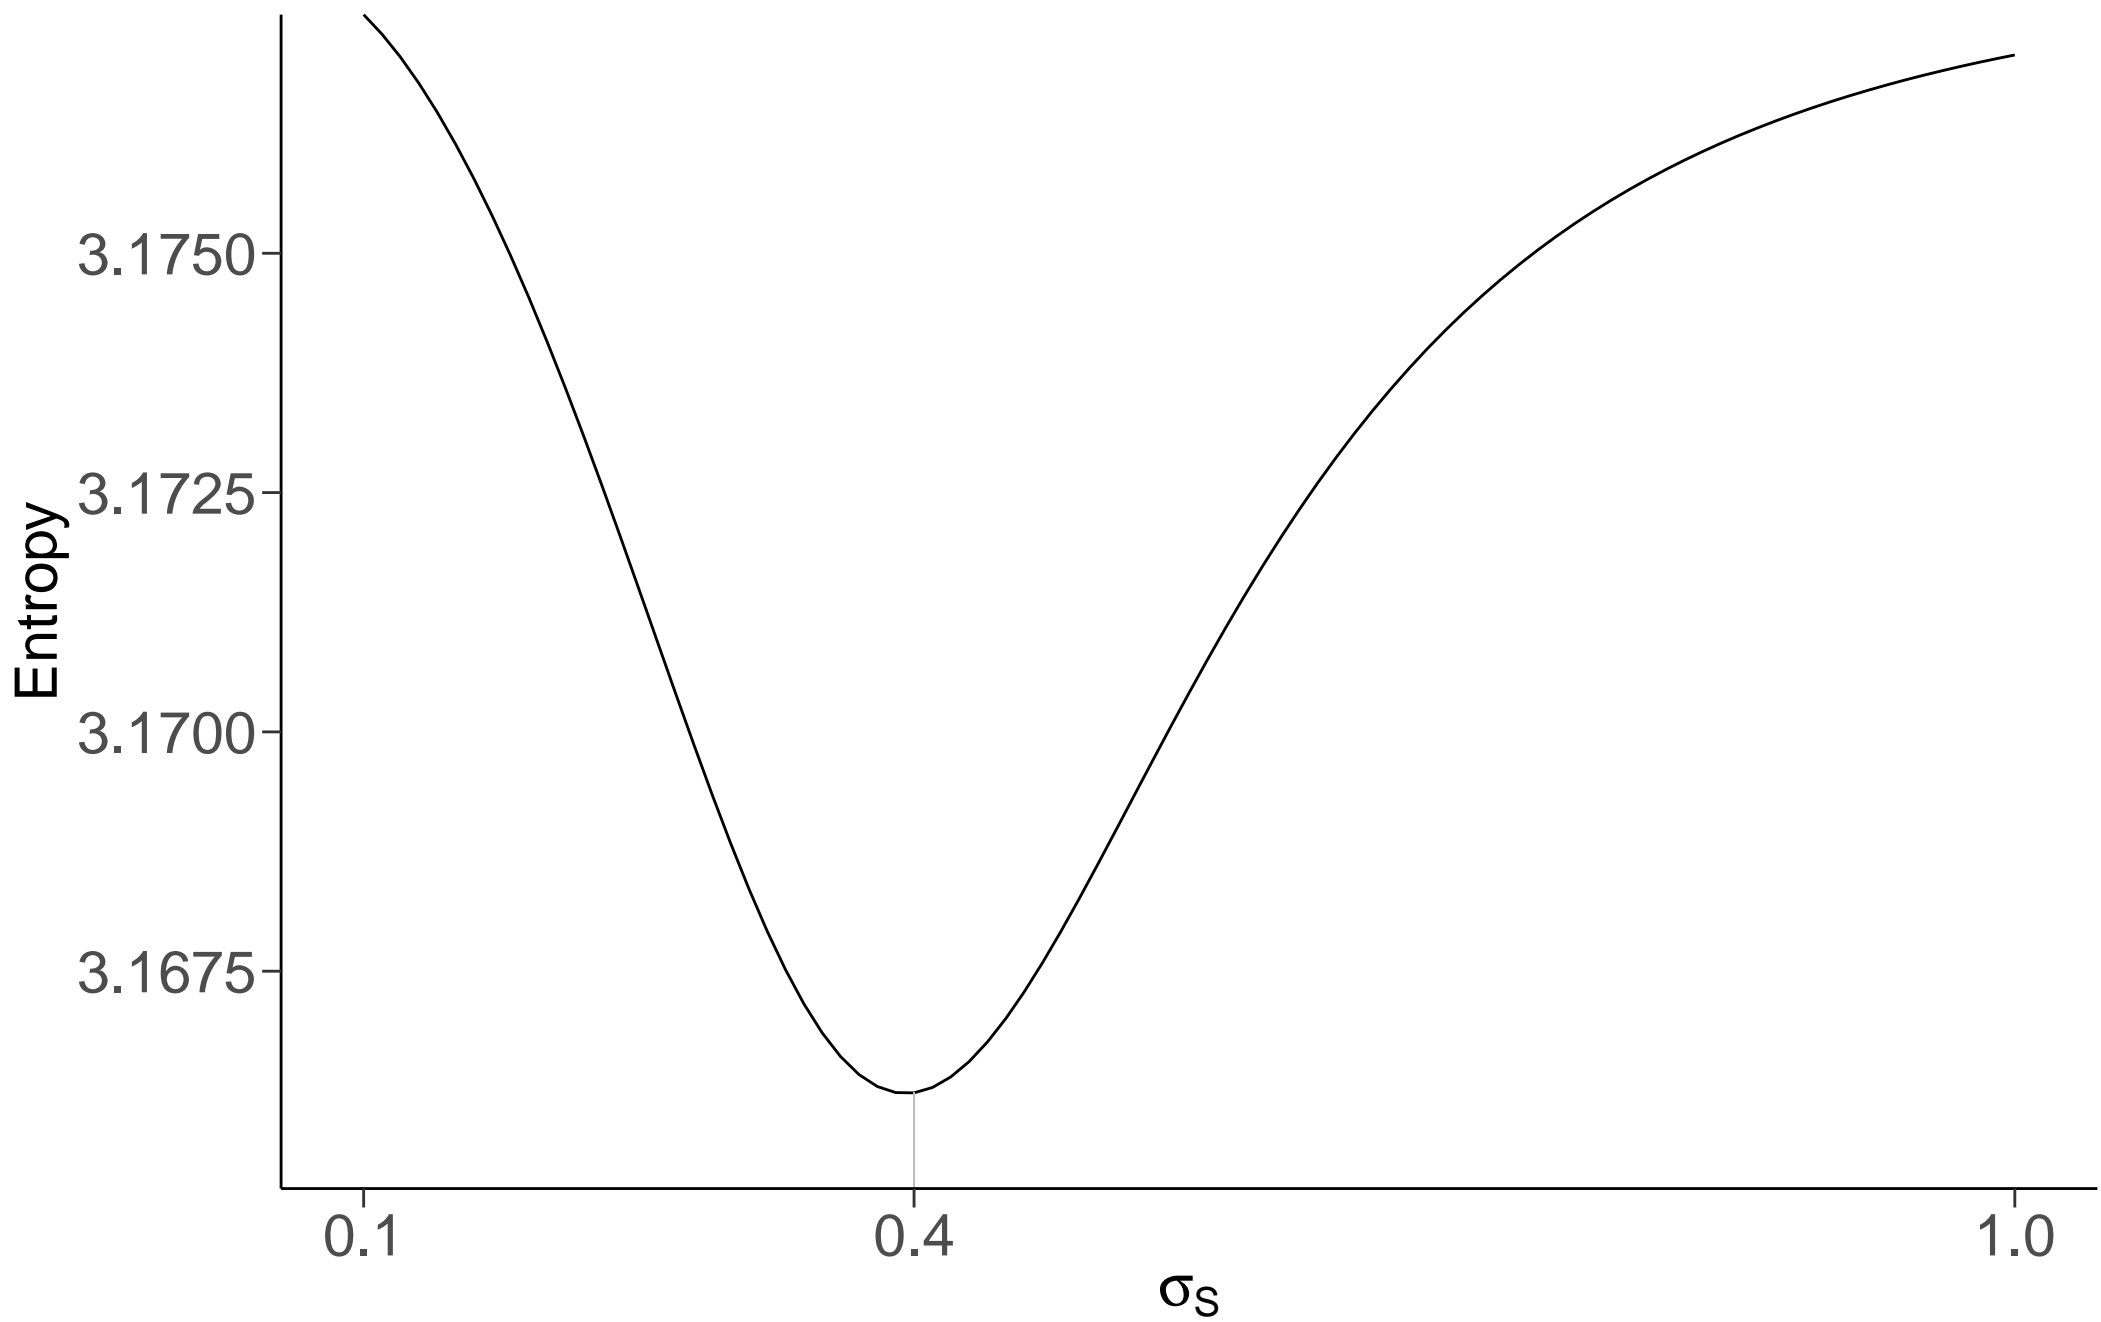

Supplement: s1 [file s1]
